# Supplementary material for: Targeting the SARS-CoV-2 HR1 with Small Molecules as Inhibitors of the Fusion Process
Source: MDPI journal article supplement (doi:10.3390/ijms231710067), 2022-09-03
Supplement: s1 [file s1]

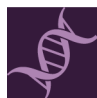

*Supplementary material*

# Targeting the SARS-CoV-2 HR1 with Small Molecules as Inhibitors of the Fusion Process

Davide Gentile, Alessandro Coco, Vincenzo Patamia, Chiara Zagni, Giuseppe Floresta and Antonio Rescifina \*

Dipartimento di Scienze del Farmaco e della Salute, Università di Catania, Viale A. Doria 6,  
95125 Catania, Italy

\* Correspondence: arescifina@unict.it

## Table of content

|            |   |
|------------|---|
| Scheme S1  | 2 |
| Figure S1  | 3 |
| Figure S2  | 3 |
| Figure S3  | 4 |
| Figure S4  | 4 |
| Figure S5  | 5 |
| Figure S6  | 5 |
| Figure S7  | 6 |
| Figure S8  | 6 |
| Figure S9  | 7 |
| Figure S10 | 7 |
| Table S1   | 8 |

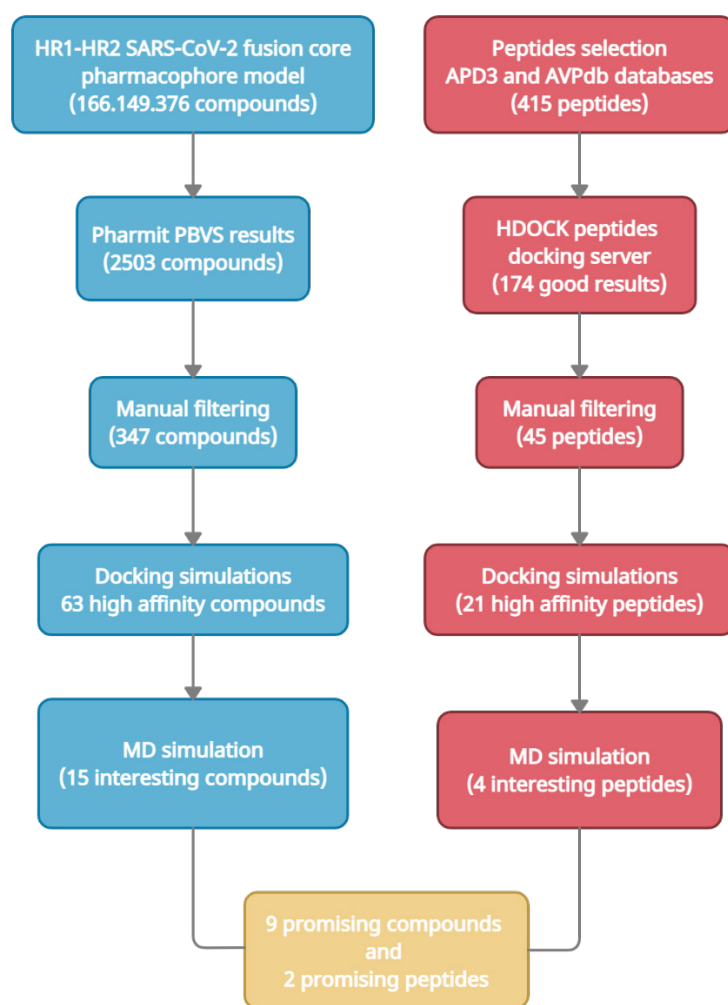

**Scheme S1.** Used workflow for the *in-silico* screening.

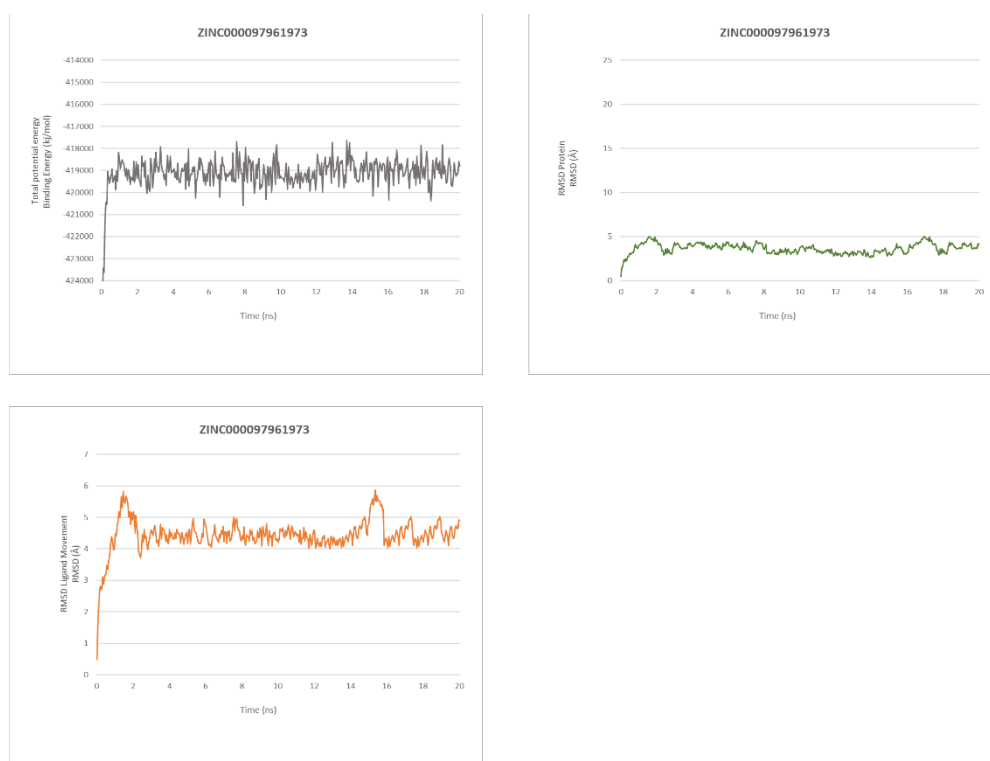

**Figure S1.** ZINC000097961973@HR1 domain. Total energy (up-left), RMSDs of protein (up-right) and RMSDs of ligand (down-left).

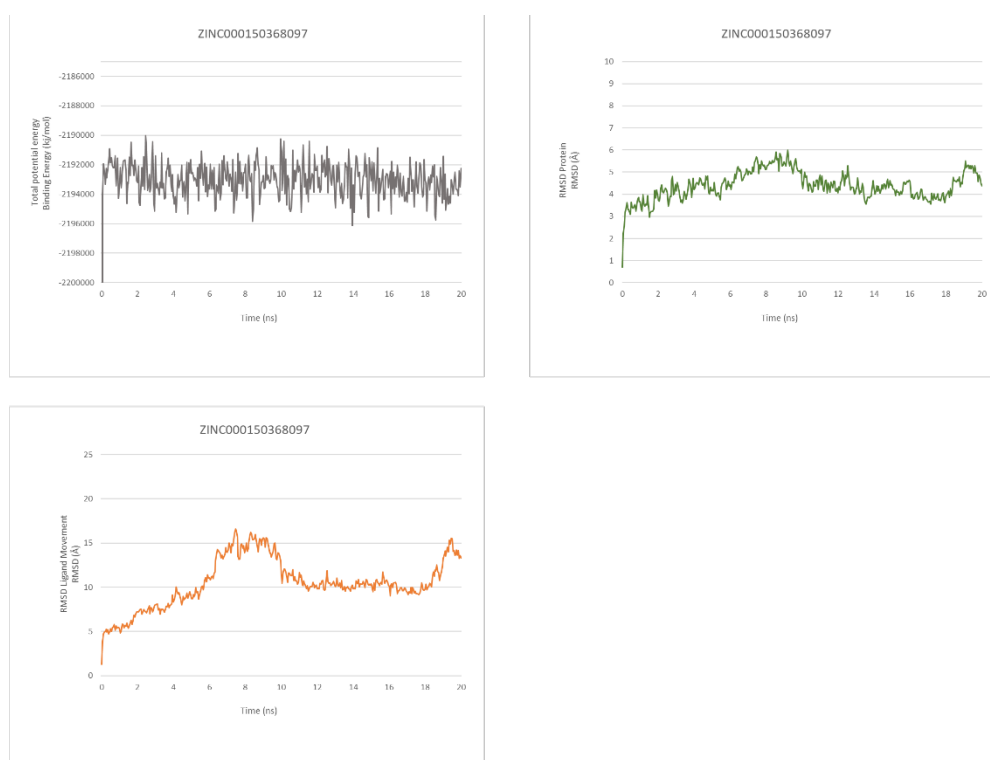

**Figure S2.** ZINC000150368097@HR1 domain. Total energy (up-left), RMSDs of protein (up-right) and RMSDs of ligand (down-left).

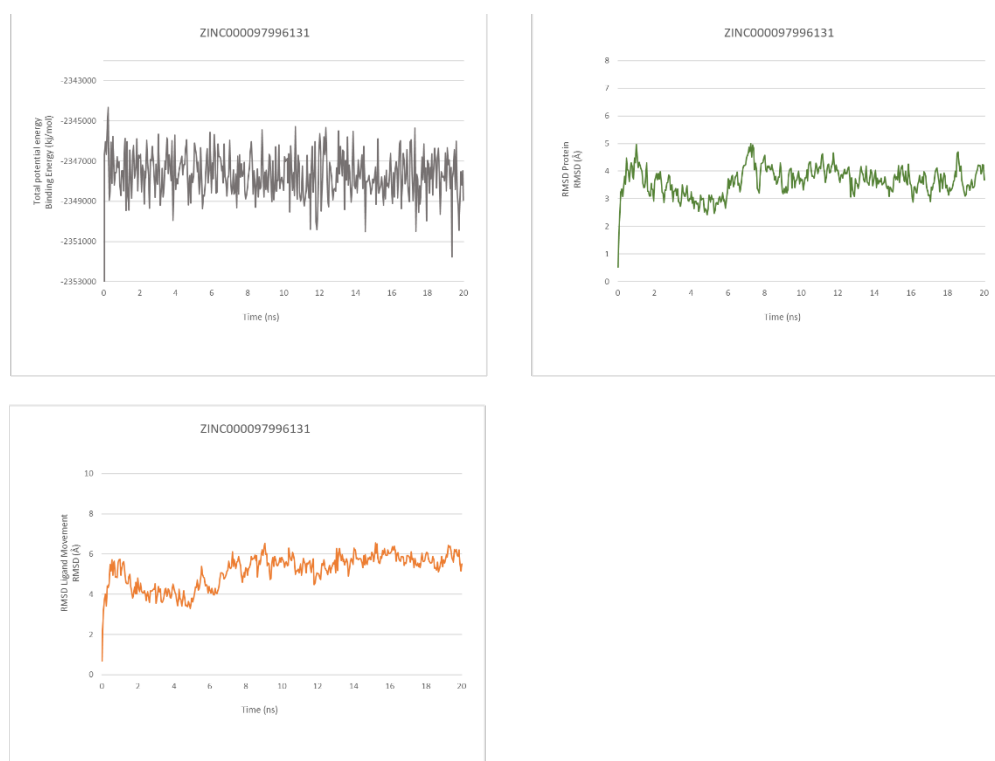

**Figure S3.** ZINC000097996131@HR1 domain. Total energy (up-left), RMSDs of protein (up-right) and RMSDs of ligand (down-left).

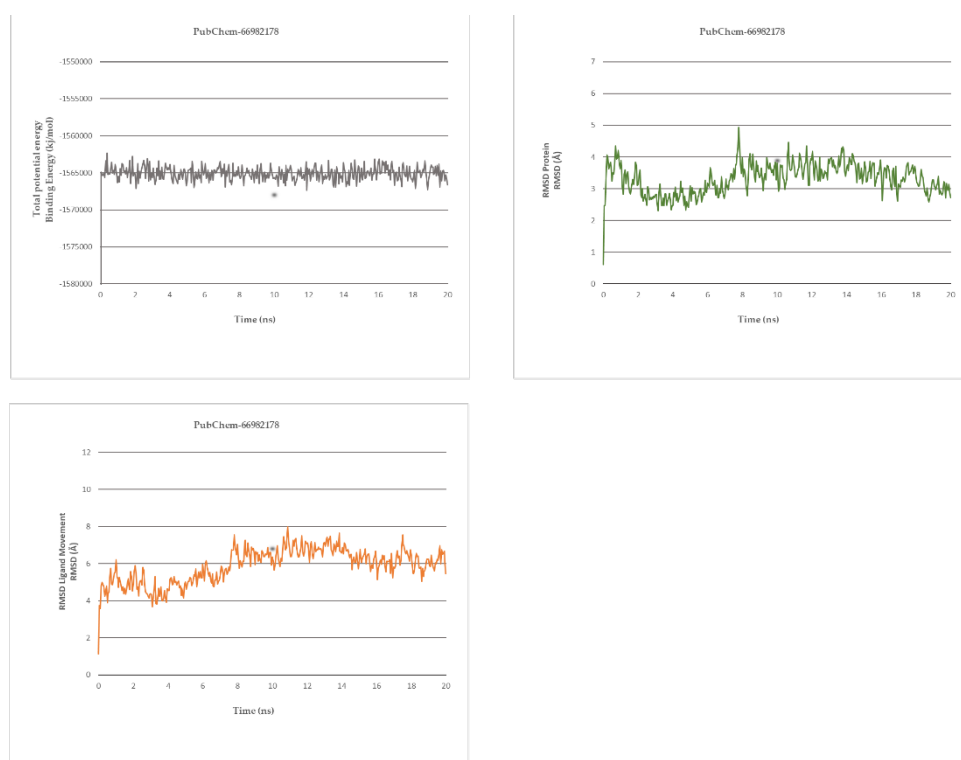

**Figure S4.** PubChem-66982178@HR1 domain. Total energy (up-left), RMSDs of protein (up-right) and RMSDs of ligand (down-left).

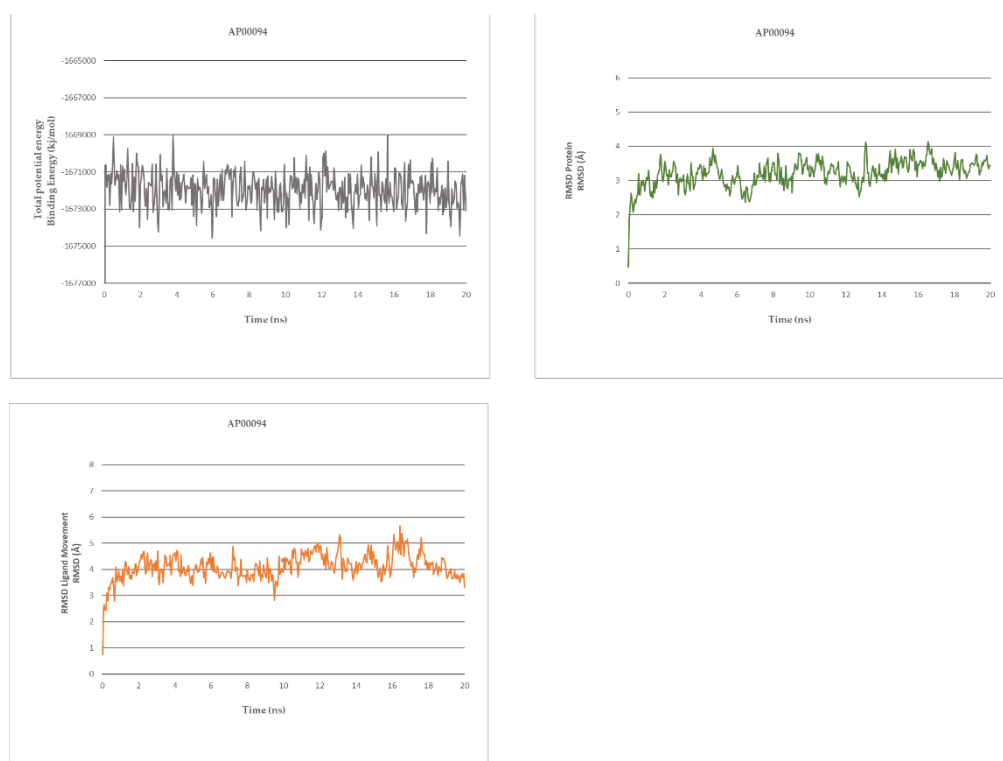

**Figure S5.** AP00094@HR1 domain. Total energy (up-left), RMSDs of protein (up-right) and RMSDs of ligand (down-left).

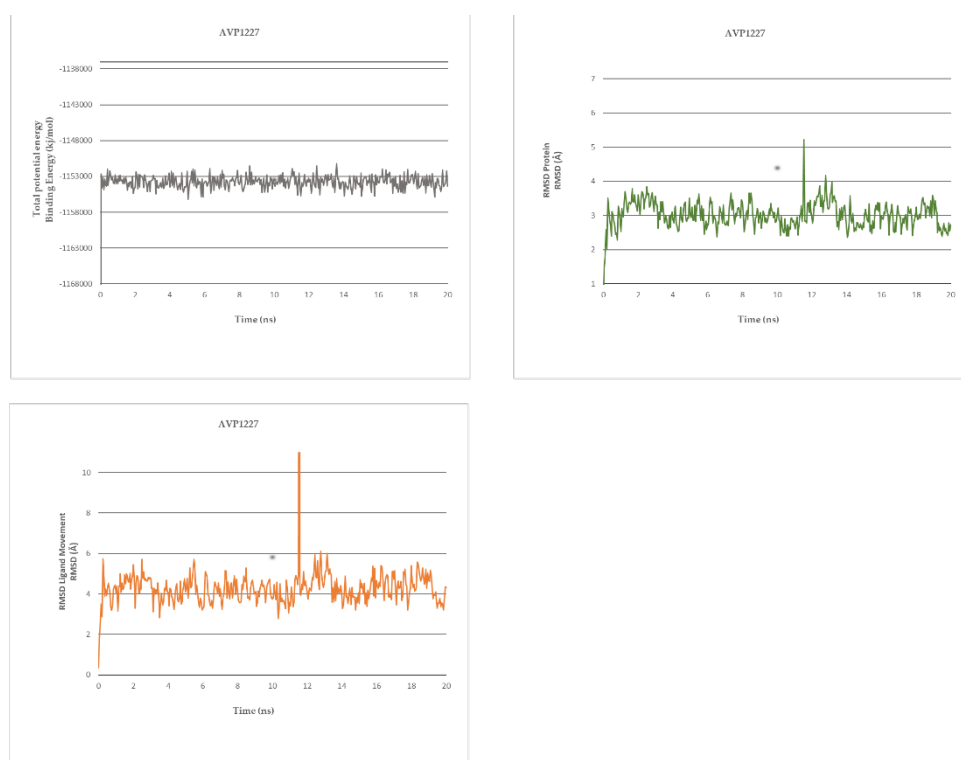

**Figure S6.** AVP1227@HR1 domain. Total energy (up-left), RMSDs of protein (up-right) and RMSDs of ligand (down-left).

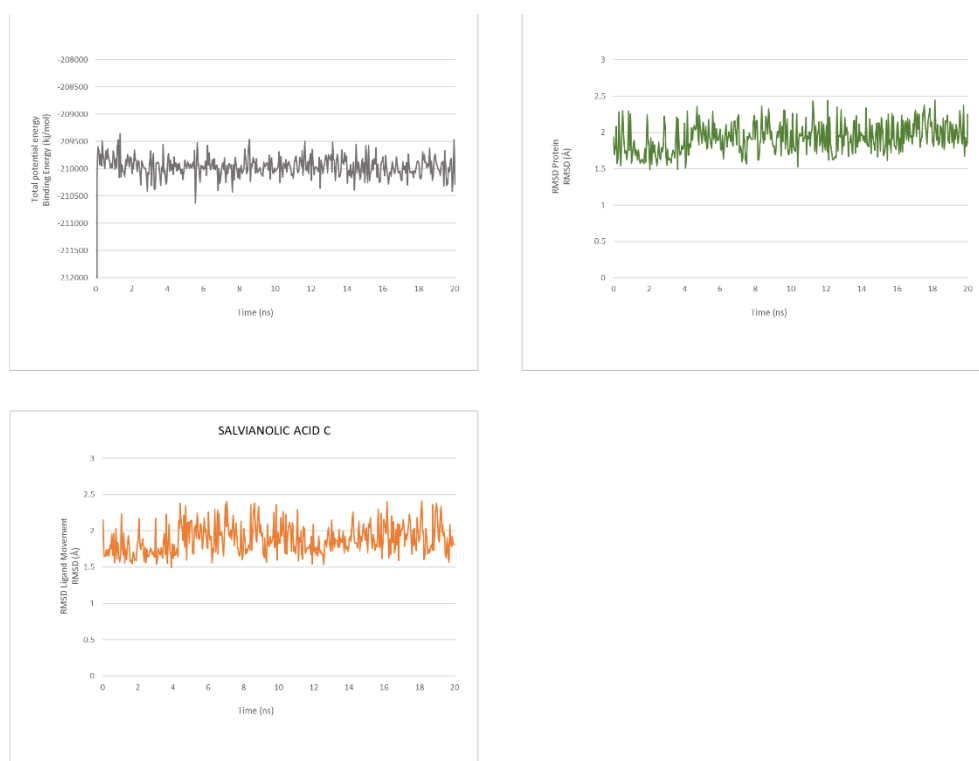

**Figure S7.** Sal C@HR1 domain. Total energy (up-left), RMSDs of protein (up-right) and RMSDs of ligand (down-left).

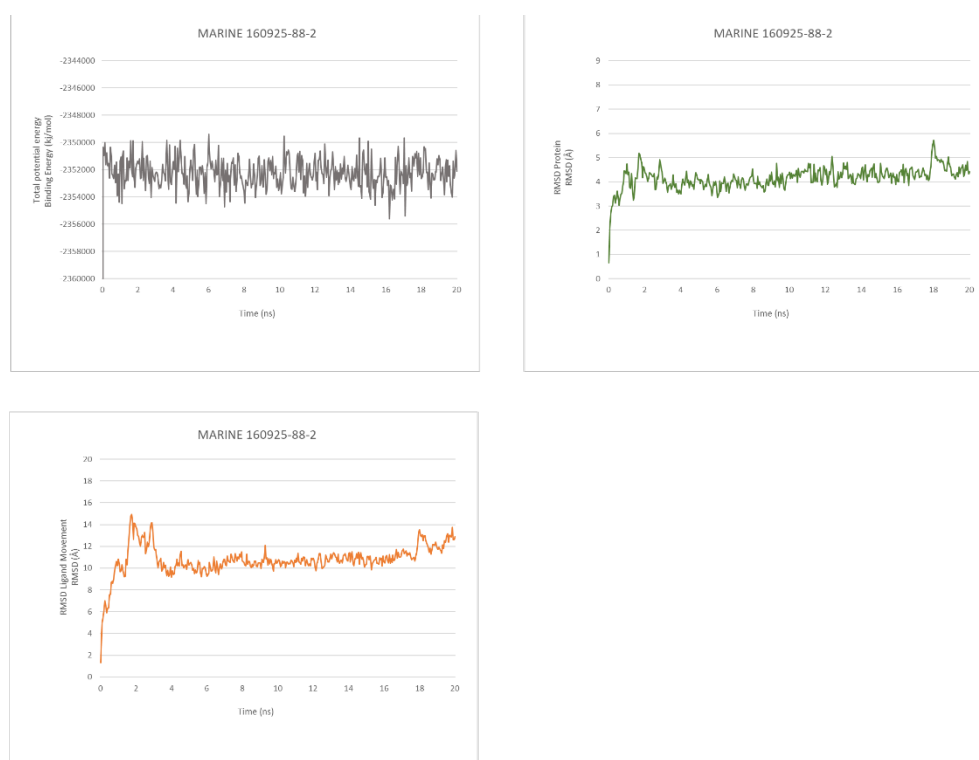

**Figure S8.** Marine-160925-88-2@HR1 domain. Total energy (up-left), RMSDs of protein (up-right) and RMSDs of ligand (down-left).

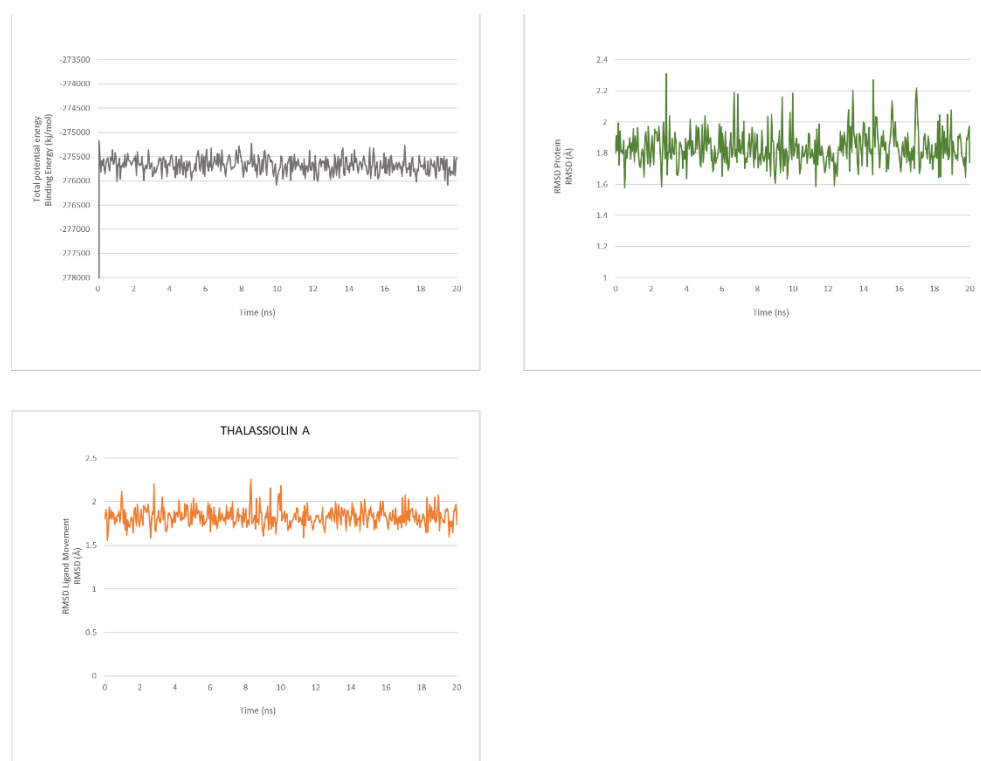

**Figure S9.** Thalassiolin A@HR1 domain. Total energy (up-left), RMSDs of protein (up-right) and RMSDs of ligand (down-left).

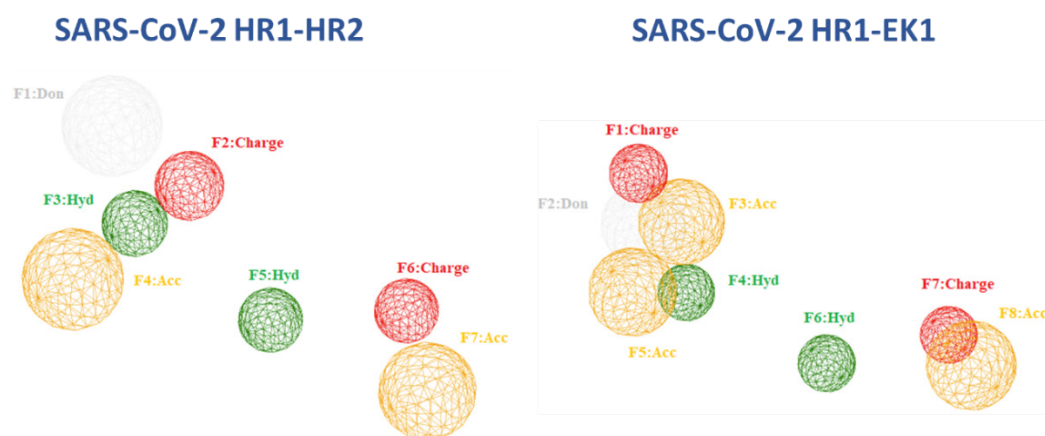

**Figure S10.** Main interactions described in the pharmacophore model of HR1-HR2 and HR1-EK1.

**Table S1.** AutodockLGA simulation results for best-scoring compounds.

| N. | Name                               | Structure                                                                            | $\Delta G$<br>Auto-dock4<br>kcal/mol |
|----|------------------------------------|--------------------------------------------------------------------------------------|--------------------------------------|
| 1  | NF 023 hydrate<br>PubChem-24278597 | 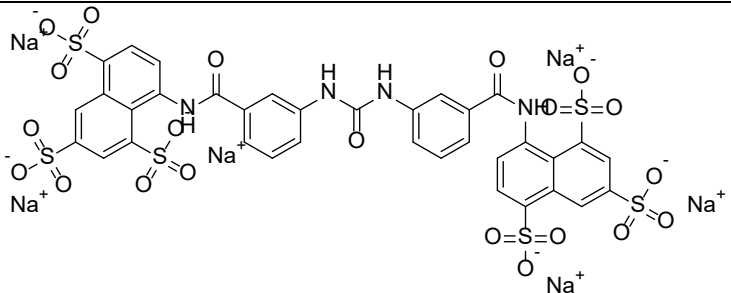   | -12.03                               |
| 2  | ZINC000097961973                   |    | -10.73                               |
| 3  | ZINC000150368097                   |   | -10.68                               |
| 4  | ZINC000169332064                   |  | -10.59                               |
| 5  | ZINC000097996131                   |  | -10.38                               |



|    |                    |                                                                                      |        |
|----|--------------------|--------------------------------------------------------------------------------------|--------|
| 6  | ZINC000150346512   | 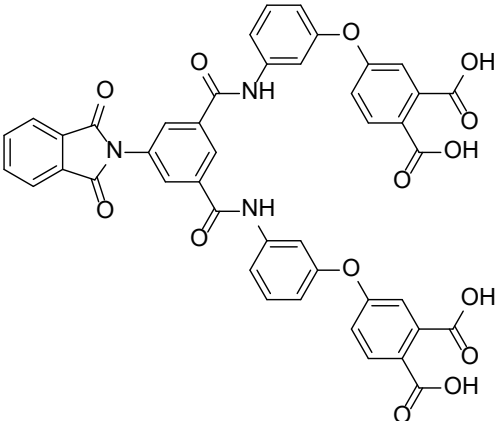   | -10.34 |
| 7  | ZINC000150631141   |   | -10.31 |
| 8  | Marine-160925-88-2 |  | -10.21 |
| 9  | PubChem-66982178   |  | -10.12 |
| 10 | ZINC000150485530   |  | -10.04 |

|    |                               |                                                                                      |       |
|----|-------------------------------|--------------------------------------------------------------------------------------|-------|
| 11 | PubChem-24742078              | 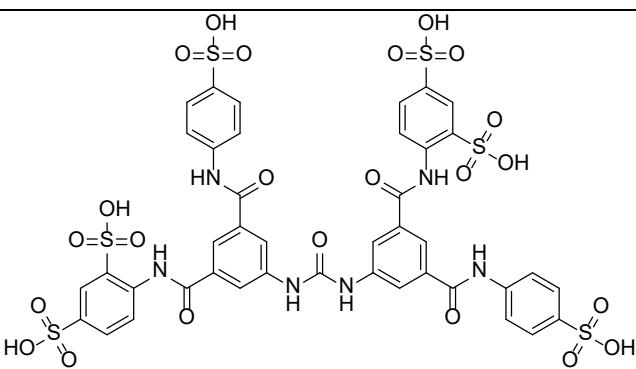   | -9.94 |
| 12 | Thalassiolin A                |   | -9.94 |
| 13 | ADS-J1@SARS-CoV-1 fusion core |  | -9.76 |
| 14 | ZINC263603439                 |  | -9.73 |

|    |                               |                                                                                                                                                                                                                                                                                                                                                                                                                                |       |
|----|-------------------------------|--------------------------------------------------------------------------------------------------------------------------------------------------------------------------------------------------------------------------------------------------------------------------------------------------------------------------------------------------------------------------------------------------------------------------------|-------|
| 15 | ADS-J1@SARS-CoV-2 fusion core | 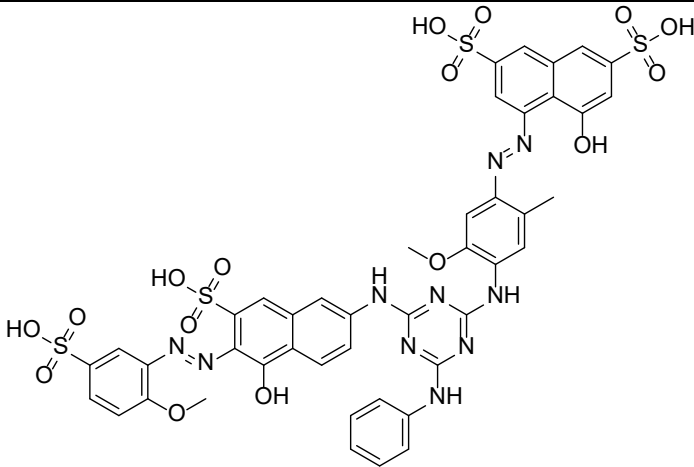 <p>The structure shows a complex molecule with multiple sulfonamide and hydroxyl groups. It features a central benzotriazole core substituted with a 4-methoxyphenyl group, a 4-hydroxyphenyl group, and a 4-sulfamoylphenyl group. A 4-sulfamoylphenyl group is also attached to the triazole ring via an azo linkage.</p>                 | -8.80 |
| 16 | Salvianolic acid C            |  <p>The structure is a polyphenolic compound consisting of a central chromane core. It has a 4-hydroxyphenyl group at position 2, a 4-hydroxyphenyl group at position 7, and a 4-hydroxyphenyl group at position 8. A 4-hydroxyphenyl group is also attached to the chromane core via an ester linkage.</p>                                  | -8.75 |
| 17 | PubChem-10169258              |  <p>The structure is a complex polycyclic molecule with multiple fused rings. It features a central steroid-like core with various functional groups, including a 4-sulfamoylphenyl group, a 4-hydroxyphenyl group, and a 4-sulfamoylphenyl group. A 4-sulfamoylphenyl group is also attached to the steroid core via an ester linkage.</p> | -8.26 |
